1 **Endogenous suppression of WNT signalling in human embryonic**  
2 **stem cells leads to low differentiation propensity towards definitive**  
3 **endoderm**

4 Dominika Dziejzicka<sup>1</sup>, Mukul Tewary<sup>2,3</sup>, Alexander Keller<sup>1</sup>, Laurentijn Tilleman<sup>4</sup>, Laura  
5 Prochazka<sup>2</sup>, Joel Östblom<sup>2</sup>, Edouard Couvreur De Deckersberg<sup>1</sup>, Christina Markouli<sup>1</sup>, Silvie  
6 Franck<sup>1</sup>, Filip Van Nieuwerburgh<sup>4</sup>, Claudia Spits<sup>1</sup>, Peter W. Zandstra<sup>2,5,6</sup>, Karen Sermon<sup>1,\*</sup>,  
7 Mieke Geens<sup>1</sup>

8 1 – Research Group Reproduction and Genetics, Vrije Universiteit Brussel, 1090, Brussels,  
9 Belgium

10 2 – Institute of Biomaterials and Biomedical Engineering, University of Toronto, M5S 3E1,  
11 Toronto, Ontario, Canada

12 3 – Centre for Stem Cells and Regenerative Medicine, King's College London, Guy's  
13 Hospital, SE1 9RT, London, United Kingdom

14 4 – Laboratory of Pharmaceutical Biotechnology, Ghent University, 9000, Ghent, Belgium

15 5 – Michael Smith Laboratories, University of British Columbia, V6T 1Z4, Vancouver, British  
16 Columbia, Canada

17 6 – School of Biomedical Engineering, University of British Columbia, V6T 1Z3, Vancouver,  
18 British Columbia, Canada

19 \* Corresponding author: karen.sermon@vub.be

## 20 **Summary**

21 Low differentiation propensity towards a targeted lineage can significantly hamper the utility  
22 of individual human pluripotent stem cell (hPSC) lines in biomedical applications. Here, we  
23 use monolayer and micropatterned cell cultures, as well as transcriptomic profiling, to  
24 investigate how variability in signalling pathway activity between human embryonic stem cell  
25 lines affects their differentiation efficiency towards definitive endoderm (DE). We show that  
26 endogenous suppression of WNT signalling in hPSCs at the onset of differentiation prevents  
27 the switch from self-renewal to DE specification. Gene expression profiling reveals that this  
28 inefficient switch is reflected in *NANOG* expression dynamics. Importantly, we demonstrate  
29 that higher WNT stimulation or inhibition of the PI3K/AKT signalling can overcome the DE  
30 commitment blockage. Our findings highlight that redirection of the activity of Activin/NODAL  
31 pathway by WNT signalling towards mediating DE fate specification is a vulnerable spot, as  
32 disruption of this process can result in poor hPSC specification towards DE.

## 33 **Introduction**

34 The use of human pluripotent stem cells (hPSCs) in biomedical applications is hampered by  
35 variable efficiencies with which individual lines differentiate towards desired cell lineages  
36 (Bock et al., 2011; Hu et al., 2010; Kim et al., 2007; Osafune et al., 2008). Both (epi)genetic  
37 and environmental factors can contribute to this functional variability (Keller et al., 2018;  
38 Ortmann and Vallier, 2017). For example, differences in genetic, epigenetic and  
39 transcriptomic profiles between individual hPSC lines (Adewumi et al., 2007; Bock et al.,  
40 2011; Kilpinen et al., 2017; Markouli et al., 2019; Skottman et al., 2005) can lead to different  
41 levels of activity of signalling pathways, resulting in an individual line's differential response  
42 to differentiation cues.

43 Human PSC differentiation efficiency can be improved by optimising differentiation  
44 conditions for individual lines (Hu et al., 2010; Kattman et al., 2011), or by screening and  
45 selecting lines with the highest differentiation efficiency for an intended application. While  
46 specific expression profiles at the undifferentiated stage can act as indicators of hPSC  
47 differentiation propensity (Jiang et al., 2013; Kim et al., 2011; Ran et al., 2013), not all  
48 disruptions to differentiation programmes are detectable at this stage. Therefore, a more  
49 optimal screening approach can be to evaluate lines based on their early lineage  
50 specification efficiency. Moreover, studying mechanisms which lead to differentiation bias  
51 can improve our knowledge about key signalling pathways involved in hPSC fate  
52 specification and lead to further improvement of differentiation protocols.

53 Given the importance of querying the differentiation potential of multiple hPSC lines, tools  
54 have been developed to address this question in a standardized manner. Examples include  
55 the TeratoScore, which quantitatively assesses trilineage differentiation capacity based on  
56 gene expression signatures of hPSC-derived teratomas (Avior et al., 2015), and the  
57 ScoreCard, which scores the gene expression profiles of differentiating embryoid bodies  
58 (EBs; Bock et al., 2011; Tsankov et al., 2015). However, both methods are suboptimal for  
59 high-throughput studies because they are time-consuming, taking from 7 days (ScoreCard)

60 to several weeks (TeratoScore). In contrast, a recently developed *in vitro* platform allows for  
61 the generation of peri-gastrulation-like fate patterning in geometrically-confined colonies  
62 within only 2 days (Tewary et al., 2017, 2018), and has been recently validated for robust  
63 and quantitative screening of differentiation propensities of multiple hPSC lines (Tewary et  
64 al., 2019). Thus, this micropatterned differentiation can be a valuable alternative to the  
65 previously established tools.

66 Efficient differentiation of hPSCs towards endodermal lineages, e.g. of liver or pancreas, is  
67 of great value to regenerative medicine and drug development. Most established  
68 differentiation protocols initiate definitive endoderm (DE) specification by modulating the  
69 activity of Activin/NODAL and WNT signalling (D'Amour et al., 2006; Pagliuca et al., 2014;  
70 Rezanian et al., 2012), though some additionally employ modifiers of FGF, BMP and/or  
71 PI3K/AKT pathway activity (Hannan et al., 2013; Loh et al., 2014). The Activin/NODAL  
72 pathway is known to play an important role in both maintaining pluripotency and guiding the  
73 cells towards DE specification (Bertero et al., 2015; Brown et al., 2011), whereas the role of  
74 WNT signalling in DE differentiation is to switch the specificity of Activin/NODAL signalling  
75 from supporting pluripotency to initiating mesendoderm specification (D'Amour et al., 2006;  
76 Funa et al., 2015; Yoney et al., 2018).

77 Our study aimed to uncover how variability in the activity of key signalling pathways  
78 associated with either maintenance of pluripotency or early lineage specification influences  
79 the differentiation propensity of individual hPSC lines towards DE. We used short-term  
80 monolayer differentiation protocols and the peri-gastrulation-like patterning to classify our  
81 human embryonic stem cell (hESC) lines according to their early differentiation propensity  
82 towards DE lineages and subsequently evaluated their transcriptomic profiles. Our results  
83 show that endogenous suppression of WNT signalling can result in reduced hPSC  
84 differentiation propensity towards DE and highlights that the essential switch of  
85 Activin/NODAL activity is a vulnerable spot on the way to efficient DE specification.

## 86 Results

87 Differentiation propensity screen identifies a hESC line with poor differentiation  
88 efficiency towards DE

89 We first screened a panel of four hESC lines (VUB01, VUB02, VUB03 and VUB04), routinely  
90 grown on human recombinant laminin-521 (LN521), for their efficiency to differentiate  
91 towards DE. We used established directed differentiation protocols towards mesendoderm,  
92 DE and hepatic progenitors (Cameron et al., 2015; D'Amour et al., 2005; Sui et al., 2012)  
93 adapted to LN521-based culture (**Fig. 1A**). After the first 24h of mesendoderm  
94 differentiation, we detected differences in the induction of the primitive streak marker  
95 *Brachyury (T)*, with VUB03 and VUB04 lines showing the lowest but variable upregulation  
96 (**Fig. 1B, C**). In the subsequent 48h differentiation towards DE, VUB04 performed the  
97 poorest (**Fig. 1D-F, Fig. S1A**), with significantly lower expression of DE markers *SOX17* (on  
98 average 6.25-fold decrease) and *FOXA2* (on average 4.03-fold decrease) in comparison to  
99 the other three lines. VUB04 also retained high expression (6.11-fold increase) of the  
100 pluripotency marker *POU5F1* (**Fig. 1D**). Consistently, at the protein level, less than 10% of  
101 the VUB04 cells were positive for *SOX17*, whereas other lines showed a range of 65-80%  
102 *SOX17*-positive cells (**Fig. 1E**). In addition, 85% of VUB04 cells still expressed *POU5F1*,  
103 which was significantly higher than the other lines, suggesting that VUB04 did not efficiently  
104 exit the pluripotent state. Next, we subjected VUB04 to 8-day hepatic progenitor (HP)  
105 differentiation to establish whether the inability to specify towards DE lineages hampered the  
106 specification of DE derivatives. As suspected, expression of hepatic progenitor markers  
107 *HNF4 $\alpha$* , *AFP* and *SOX17* was significantly lower and the expression of pluripotency markers  
108 *POU5F1* and *SOX2* significantly higher in VUB04 in comparison to VUB01 (**Fig. 1G, H**).

109 To check whether the differentiation impairment of VUB04 is specific towards the DE lineage  
110 or more general, we differentiated all four hESC lines to the neuroectoderm lineage (**Fig.**  
111 **S1B**). Although some variability in the expression levels of *PAX6* and *SOX1* was observed,

112 VUB04 did not differ significantly from the other lines (**Fig. S1C, D**). Additionally, we  
113 performed 12-day spontaneous EB differentiation in serum-free APEL™ medium, followed  
114 by gene expression profiling with the ScoreCard assay. For this, we generated equal-sized  
115 aggregates following our previously published protocol (Dziedzicka et al., 2016) to avoid any  
116 potential differentiation bias originating from differentially sized EBs. Intriguingly, the  
117 ScoreCard indicated that all VUB lines, including VUB04, significantly downregulated  
118 pluripotency genes and upregulated genes associated with the three germ layers (**Fig. S1E**).  
119 As in this experiment the lines were subjected to spontaneous differentiation in a 3-  
120 dimensional environment, the result indicated that VUB04 does not efficiently differentiate  
121 towards DE upon exposure to defined modulators of signalling pathways in conventional  
122 monolayer cultures.

### 123 Micropatterned differentiation confirms hESC differentiation propensity

124 To confirm that VUB04 has an impaired response to DE specification cues, we subjected our  
125 lines to directed differentiation in an alternative culture system. We used a micropatterning  
126 technology which allows for precise control of spatial microenvironment by confining cells to  
127 defined circular geometries. It has been recently demonstrated that in this system, upon  
128 BMP4 induction, micropatterned circular colonies of hPSCs form radially segregated regions  
129 of a population of cells retaining SOX2 expression in the centre and a ring of T-positive cells  
130 close to the edge (Tewary et al., 2017). Additionally, we recently showed that by modifying  
131 culture conditions it is also possible to obtain the DE population within these micropatterns,  
132 with cells double positive for SOX17 and FOXA2 (Tewary et al., 2019). Therefore, we used  
133 these two micropatterned differentiation protocols to evaluate the differentiation responses of  
134 all four hESC lines (**Fig. 2A**). After the 48-hour BMP4 induction, we observed different fate  
135 patterning between the lines. VUB01 and VUB03 showed the radially segregated peri-  
136 gastrulation-like fates, VUB02 colonies were mostly overtaken by T-positive cells, whereas  
137 VUB04 colonies only showed a slight upregulation of T at the very edge of the colonies (**Fig.**  
138 **2B**). Quantitative analysis confirmed that most of the cells within VUB04 colonies retained

139 the expression of SOX2, whereas fewer than 10% were positive for T (**Fig. 2C**). Importantly,  
140 VUB04 also demonstrated a poor response in the DE micropatterned differentiation. Here  
141 again, we observed a similar variability in fate patterning as with the BMP4 induction, with  
142 VUB02 colonies largely consisting of cells positive for DE markers, whereas VUB04 colonies  
143 only displaying a thin outside ring of SOX17- and FOXA2-double positive cells (**Fig. 2D**).  
144 Although variability was observed in the amount of double positive cells between the  
145 colonies of the same line, VUB04 consistently showed the worst induction towards the DE  
146 fate (**Fig. 2E**). These results were consistent with our previous finding that VUB04 displays a  
147 low differentiation propensity towards DE in directed differentiation protocols when starting  
148 from monolayer cultures.

149 Distinct transcriptomic profile of undifferentiated VUB04 cells does not explain the  
150 low DE differentiation propensity

151 Based on the observations described above, we hypothesised that VUB04 does not respond  
152 efficiently to DE differentiation cues because it differently regulates the activity of signalling  
153 pathways involved in DE specification. Therefore, we performed bulk mRNA-sequencing of  
154 the hESC lines at the undifferentiated stage to identify potential differences in the  
155 transcriptomic profile of VUB04. Unsupervised clustering analysis of the transcriptomic data  
156 showed that all VUB04 samples cluster separately from the other three lines (**Fig. 3A**).  
157 Although each hESC line demonstrated some differences in its expression profile, the first  
158 Principal Component which accounted for 41.7% variability between all the samples  
159 clustered all the VUB04 samples away from the other samples (**Fig. 3B**). Therefore, in the  
160 following differential expression analysis we compared VUB04 to the other three lines,  
161 grouped as the control. The analysis showed that 579 genes are more than twofold up- or  
162 down-regulated in VUB04 at the FDR < 0.05 significance level (**Fig. 3C, Fig. S2A**).  
163 Additionally, we observed differential expression of the pluripotency markers *POU5F1*,  
164 *SOX2* and *NANOG* in VUB04 (**Fig. 3D**). Although these were less than a twofold difference,  
165 it was an interesting observation given the high number of *POU5F1*-positive cells in VUB04

166 after 72h of DE differentiation (**Fig. 1E**). For *NANOG*, which was the most differentially  
167 expressed, we performed a copy number assay to check for a possible *NANOG* gene  
168 duplication in VUB04. The result clearly showed that VUB04 has only two copies of the  
169 *NANOG* gene (**Fig. S2B**).

170 To evaluate which factors may contribute to the distinct VUB04 expression profile, we  
171 performed additional bioinformatic analysis. We carried out transcription factor enrichment  
172 analysis for the top differentially expressed genes in VUB04 using the Enrichr tool.  
173 Interestingly, the analysis showed that the list of top differentially expressed genes is  
174 significantly enriched for SOX2 and NANOG targets (**Fig. 3E**). We then checked if any  
175 signalling pathways associated with the pluripotent state are enriched within the significantly  
176 differentially expressed genes in VUB04. GSEA analysis identified MAPK/ERK signalling as  
177 one of the most enriched pathways within the most upregulated genes in VUB04 (**Fig. 3F**,  
178 **Fig. S2C**). The MAPK/ERK pathway together with PI3K/AKT signalling have been suggested  
179 to be induced by FGF2 in hPSCs and to play important roles in the maintenance of  
180 pluripotency (Lanner and Rossant, 2010). However, the enrichment for PI3K signalling within  
181 the most upregulated genes in VUB04 was not statistically significant (FDR > 0.05; **Fig. 3G**).  
182 Furthermore, the expression profile of VUB04 at the undifferentiated stage did not indicate  
183 any clear deregulation for Activin/NODAL and WNT pathways, which are crucially involved in  
184 DE specification. Together, the transcriptomic analysis at the undifferentiated stage did not  
185 provide a clear reason for the VUB04 differentiation impairment.

186 Transcriptomic profile after 24-hour DE differentiation suggests inefficient activation  
187 of WNT signalling in VUB04

188 We thus hypothesised that the influence of the distinct expression profile of VUB04 on its DE  
189 differentiation propensity is mainly manifested once the line is exposed to specific  
190 differentiation signals. During the first 24h of DE differentiation, cells were incubated with  
191 both the WNT signalling activator CHIR and Activin A – a ligand of the Activin/NODAL



192 pathway. As Activin/NODAL signalling is active in both pluripotency and during endoderm  
193 specification, whereas WNT signalling is stimulated only during the first 24h of endoderm  
194 differentiation and is required to switch the activity of Activin/NODAL pathway, we assessed  
195 whether WNT signalling was efficiently induced in VUB04 after this period.  
196 Immunofluorescent analysis showed that  $\beta$ -catenin is not present in the nuclei at the  
197 undifferentiated stage but changes its cellular localization after 24h DE differentiation in both  
198 VUB01 and VUB04 (**Fig. S3**). However, nuclear localization of  $\beta$ -catenin does not  
199 necessarily imply efficient expression of WNT signalling downstream targets. Therefore, we  
200 performed transcriptomic analysis at the 24-hour DE differentiation timepoint, using VUB01  
201 and VUB02 as a control group, as they robustly differentiate towards mesendodermal  
202 derivatives (**Fig. 1, Fig. 2**), indicating efficient activation of WNT signalling. As in the  
203 undifferentiated state, VUB04 displayed a different expression profile, clustering away from  
204 the control lines (**Fig. 4A**). There were 1054 genes expressed twofold higher or lower in  
205 VUB04 samples than in the control lines at the FDR < 0.05 significance level (**Fig. 4B**).  
206 Transcription factor enrichment analysis indicated that the list of top deregulated genes in  
207 VUB04 is significantly enriched for NANOG and SOX2 (**Fig. 4C**), again suggesting an  
208 inefficient exit from pluripotency after 24-hour differentiation (**Fig. 4D**). While pluripotency  
209 genes remained upregulated, many downstream targets of the WNT pathway (e.g. *LEF1*,  
210 *DKK1*, *DKK4*) had little to no expression, and most of the genes associated with primitive  
211 streak formation (e.g. *MIXL1*, *EOMES*, *T*, *GSC*) were expressed at a much lower level than  
212 in the control group (**Fig. 4D**). In agreement, Ingenuity Pathway Analysis for upstream  
213 regulators predicted that the PI3K/AKT signalling, which is linked to maintenance of the  
214 pluripotent state, and GSK3, a negative regulator of the WNT pathway, are activated in the  
215 VUB04 samples in comparison to the control group (**Fig. 4E**).

216 Increased stimulation of WNT signalling improves VUB04 differentiation efficiency  
217 towards DE

218 As WNT signalling appeared to be inefficiently activated in VUB04 during the first 24h of DE  
219 differentiation, we modified the protocol in an attempt to rescue the poor differentiation of  
220 VUB04. We observed an increase in SOX17-positive cells in VUB04 when stimulated with  
221 WNT inducer CHIR at concentrations higher than the standard 3  $\mu$ M (**Fig. 5A, Fig. S4A**),  
222 with an almost 5-times higher expression of *SOX17* and *FOXA2* when treated with 9  $\mu$ M  
223 CHIR (**Fig. 5B**). The differentiation outcome also improved when the 3  $\mu$ M CHIR condition  
224 was supplemented with the PI3K inhibitor LY294002 (LY) for the first 48h of differentiation,  
225 (**Fig. 5 A, B, Fig. S4A**). Intriguingly, the expression levels of pluripotency markers in VUB04  
226 only decreased to similar levels as in VUB01 when the cells were treated with LY, but not  
227 when higher concentrations of CHIR were used (**Fig. 5B, Fig. S4B**). Additionally, higher  
228 CHIR concentrations seemed to increase the expression of the mesodermal markers  
229 *PDGFRA* in both lines tested and *KDR* in VUB04 (**Fig. S4B**). These results suggest that  
230 active PI3K/AKT signalling may prevent efficient activation of WNT signalling at the onset of  
231 DE differentiation (**Fig. 5C**), as previously suggested (Singh et al., 2012).

232 *NANOG* expression dynamics during differentiation define DE specification efficiency

233 As the data indicated that VUB04 did not efficiently exit the pluripotent state during the DE  
234 differentiation, we compared the dynamics of pluripotency factor expression between VUB01  
235 and VUB04 over the course of the 72-hour unmodified DE differentiation protocol. In VUB01,  
236 the expression of *POU5F1* and *SOX2* significantly decreased after 24h, whereas *NANOG*  
237 expression levels remained similar to the undifferentiated stage during the entire 72h  
238 differentiation period (**Fig. 5D**). VUB04 displayed a different pattern: after 24h the  
239 downregulation of *SOX2* was less pronounced and *POU5F1* and *NANOG* expression  
240 increased significantly between 24h and 48h. The latter observation coincides with CHIR  
241 withdrawal and subsequent incubation with Activin A only for the following 2 days (**Fig. 5D**).

242 Under normal circumstances, 24h WNT induction should result in the shift of Activin/NODAL  
243 signalling activity from promoting pluripotency to driving DE specification. The fact that  
244 *POU5F1* and *NANOG* expression levels increased at the 48-hour timepoint indicated that  
245 exit from pluripotency is not efficiently induced in VUB04, likely due to the impaired activation  
246 of WNT signalling, and that the cells remain programmed to support pluripotency when  
247 exposed to a high concentration of Activin A (**Fig. 5C**).

248 *NANOG* is one of the key nodes of the pluripotency network (Boyer et al., 2005) and it  
249 cooperates together with Activin/NODAL signalling in supporting hPSC self-renewal (Brown  
250 et al., 2011). As inhibition of PI3K/AKT signalling in VUB04 seemed to improve the exit from  
251 pluripotency and DE differentiation, we explored if reducing *NANOG* expression in VUB04  
252 prior to DE differentiation would also improve the differentiation outcome. Interestingly,  
253 knocking down *NANOG* led to improved DE differentiation (**Fig. 5E, F, Fig. S5B**), with  
254 increased expression of *SOX17* and *FOXA2* after 72h, though the expression levels were  
255 not as high as in VUB01 (**Fig. 5E**). Nevertheless, *NANOG* knock down in VUB04 also led to  
256 improved HP differentiation (**Fig. S5C**). At the same time, exogenous downregulation of  
257 *NANOG* in VUB01 did not result in any change in its high DE differentiation capacity (**Fig.**  
258 **5E, Fig. S5B**). Therefore, these experiments demonstrated that exogenous knockdown of  
259 *NANOG* could eliminate the failure of VUB04 to differentiate to DE. It also suggested that  
260 efficient DE specification is dependent on a certain level of *NANOG* expression, with lower  
261 expression levels likely circumventing the tempering effect that active PI3K/AKT pathway  
262 has on WNT signalling at the onset of differentiation (**Fig. 5C**).

## 263 **Discussion**

264 Functional variability among hPSC lines is a significant obstacle for their efficient use in  
265 many biomedical applications (Keller et al., 2018; Ortmann and Vallier, 2017). Here, we used  
266 two standardized short-term differentiation assays, conventional monolayer and  
267 micropatterned differentiation, to screen hESC lines for their differentiation efficiency towards  
268 DE and subsequently evaluated how differences in the intrinsic regulation of signalling

269 pathways influence the differentiation outcome. Importantly, we obtained the same  
270 predictions for DE differentiation efficiencies when the same hESC lines were subjected to  
271 these two differentiation assays in two different laboratories. We thus confirmed our recent  
272 report (Tewary et al., 2019) by showing that peri-gastrulation-like fate patterning can be used  
273 efficiently to fingerprint hPSC lines for their differentiation potential in a standardized,  
274 quantitative and robust manner. In agreement with previous studies (Hu et al., 2010;  
275 Kattman et al., 2011), we also demonstrated that it is possible to improve the low  
276 differentiation propensity of an individual line by optimising the differentiation conditions.

277 In the differentiation propensity screen, we identified VUB04, as a hESC line with a very low  
278 differentiation efficiency towards DE. Gene expression profiling during DE differentiation  
279 showed that VUB04 had a distinct expression dynamics of pluripotency genes which was  
280 coupled with inefficient priming for differentiation upon stimulation of Activin/NODAL and  
281 WNT signalling. Thus, VUB04 is a case in point that some line-specific properties can cause  
282 low differentiation efficiency towards DE fates already at the very onset of differentiation. The  
283 necessity to redirect the Activin/NODAL pathway activity to DE fate specification by WNT  
284 signalling (D'Amour et al., 2006; Funa et al., 2015; Yoney et al., 2018) is a vulnerable spot  
285 as any disruption of this process can result in a line with low DE efficiency.

286 Our study also suggests that active PI3K/AKT signalling has a tempering effect on efficient  
287 activation of WNT signalling during DE differentiation, as inhibiting PI3K/AKT signalling led to  
288 increased DE efficiency in VUB04. The mechanism by which PI3K/AKT signalling regulates  
289 pluripotency and early lineage specification is still being investigated. One study proposed  
290 that it plays a central role in maintaining hPSC pluripotency by modulating Activin/NODAL  
291 signalling to support self-renewal and by suppressing MAPK/ERK and WNT signalling  
292 pathways to prevent mesendoderm specification (Singh et al., 2012). According to this  
293 model, the switch in the Activin/NODAL signalling activity requires inactivation of the  
294 PI3K/AKT pathway, which in turn allows the MAPK/ERK signalling to inhibit GSK3 $\beta$  and  
295 subsequently to stimulate the WNT signalling to initiate differentiation. Although both the

296 MAPK/ERK pathway and PI3K/AKT signalling were previously reported to be downstream  
297 targets of FGF2 signalling in hPSCs, the authors propose that in culture conditions  
298 supportive of pluripotency, PI3K/AKT signalling maintains the activity level of the MAPK/ERK  
299 signalling within the range that supports the undifferentiated state (Singh et al., 2012). A very  
300 recent study reported that PI3K/AKT pathway is active in early human embryos and showed  
301 that hPSCs could be expanded *in vitro* in the presence of PI3K activators and Activin A  
302 without the addition of FGF2 (Wamaitha et al., 2020), which may suggest a dominant role of  
303 PI3K pathway over MAPK/ERK signalling in supporting hPSC self-renewal. Based on these  
304 studies and our data, we suspect that both the activity of MAPK/ERK and PI3K/AKT are  
305 elevated in VUB04 with PI3K signalling playing a dominant role in preventing VUB04 from  
306 exiting the pluripotent state during DE differentiation. Additional proteomic analysis of the  
307 PI3K/AKT and MAPK/ERK components would provide more evidence for this signalling  
308 pathway crosstalk.

309 Interestingly, reducing *NANOG* expression at the undifferentiated stage in VUB04 also  
310 improved DE specification. *NANOG* has been shown to be necessary during mesendoderm  
311 specification, whereas its strong downregulation initiates neuroectoderm specification  
312 (Vallier et al., 2009; Wang et al., 2012). Thus, our results suggest that the effect of *NANOG*  
313 on hPSC differentiation depends on its expression level, as downregulation of *NANOG* in the  
314 control line, VUB01, was still permissive for mesendoderm differentiation and did not result  
315 in any reduction in DE differentiation efficiency. Additionally, it is likely that the exogenous  
316 downregulation of *NANOG* in VUB04 directly or indirectly influenced the activity of signalling  
317 pathways, one of which is possibly PI3K/AKT, which otherwise suppressed efficient  
318 activation of WNT signalling.

319 To conclude, this study presents relevant insight into the influence of WNT and PI3K/AKT  
320 signalling on hPSC differentiation towards DE and demonstrates that a hPSC line with a  
321 specific differentiation impairment can be used as a tool to study crosstalks between  
322 signalling pathways involved in the early lineage specification.

## 323 **Experimental procedures**

### 324 Human ESC culture

325 Human ESC lines VUB01, VUB02, VUB03 (VUB03\_DM1) and VUB04 (VUB04\_CF) were  
326 derived and characterized as previously described (Mateizel et al., 2006). Cells were  
327 routinely cultured on dishes coated with 5 µg/ml LN521 (Biolamina) in NutriStem® hESC XF  
328 medium (NS medium; Biological Industries) with 100 U/ml Penicillin-Streptomycin  
329 (Pen/Strep; Thermo Fisher Scientific) and passaged as single cells in a 1:10 to 1:30 ratio  
330 using TrypLE™ Express (Thermo Fisher Scientific) when 70-80% confluent. The cells were  
331 kept at 37°C in 5% CO<sub>2</sub>. All hESC lines were analysed for their genetic content by array-  
332 based comparative genomic hybridization (Human Genome CGH Microarray 4x44K, Agilent  
333 Technologies) as previously described (Jacobs et al., 2014), and chromosomally balanced  
334 frozen bulks were prepared prior to the onset of experiments. Karyotypes and passage  
335 numbers of lines used in the study can be found in **Table S1**.

### 336 Directed differentiation protocols

337 *Mesendoderm and definitive endoderm specification.* We used a modified protocol based on  
338 D'Amour *et al.* and Sui *et al.* adapted to LN521 coating (D'Amour et al., 2005; Sui et al.,  
339 2012). Briefly, hESCs were seeded at a density of  $4 \times 10^4$  cells per cm<sup>2</sup> and the  
340 differentiation was started 1-2 days later once the cells were 50-60% confluent. Cells were  
341 differentiated for 24h in RPMI 1640 Medium with GlutaMAX™ and supplemented with 2%  
342 B27 supplement (both from Thermo Fisher Scientific), 3 µM CHIR99021 (CHIR, STEMCELL  
343 Technologies) and 100 ng/mL Activin A (Biotechne). After the 24-hour mesendoderm  
344 specification, the cells were incubated for an additional 48h in the same differentiation  
345 medium but without CHIR. When indicated, the DE differentiation conditions were modified:  
346 either 1.5, 3, 4.5 or 9 µM CHIR was used during the first 24h, or the CHIR concentration was  
347 left at 3 µM but 10 µM of PI3K inhibitor LY294002 was added to the differentiation medium  
348 for the first 48h.

349 *Hepatic progenitors*. The protocol was adapted from Cameron *et al.* (Cameron *et al.*, 2015).  
350 Human ESCs were seeded on LN521 at a density of  $4 \times 10^4$  cells per  $\text{cm}^2$ . The next day, the  
351 pluripotency medium was changed to RPMI 1640 medium supplemented with GlutaMAX™,  
352 0.5% B27 supplement, 3  $\mu\text{M}$  CHIR and 100 ng/mL Activin A. After the first 24h of  
353 differentiation CHIR was removed. The day after, the medium was changed to KnockOut™  
354 DMEM containing 20% KnockOut™ Serum Replacement, 0.5% GlutaMAX™ supplement,  
355 1% MEM Non-Essential Amino Acids, 100 U/ml Pen/Strep (all from Thermo Fisher  
356 Scientific), 0.1 mM  $\beta$ -mercaptoethanol and 1% DMSO (both from Sigma-Aldrich). This  
357 differentiation step lasted until day 8 and the medium was refreshed daily.

358 Details on differentiation towards neuroectoderm lineage and EB differentiation can be found  
359 in the Supplemental Information.

#### 360 Micropatterned differentiation protocols

361 Microtiter 96-well plates with patterned islands of 1000  $\mu\text{m}$  in diameter were prepared  
362 following a previously published protocol (Tewary *et al.*, 2017). Prior to seeding cells onto  
363 the plates, the wells were activated with N-(3-Dimethylaminopropyl)-N'-ethylcarbodiimide  
364 hydrochloride and N-Hydroxysuccinimide (both from Sigma-Aldrich) for 20 minutes. The  
365 plates were thoroughly triple washed with ddH<sub>2</sub>O and incubated with 10  $\mu\text{g}/\text{mL}$  LN521  
366 diluted in Dulbecco's phosphate-buffered saline (DPBS; Thermo Fisher Scientific) with  
367 calcium and magnesium for 3 hours at 37°C or at 4°C overnight. After incubation, the plates  
368 were triple washed with DPBS to remove any passively adsorbed extracellular matrix.

369 To develop micropatterned colonies, hESCs were seeded in NS medium with 10  $\mu\text{M}$  ROCK  
370 inhibitor (ROCKi) Y-27632 at a density of  $8 \times 10^4$  cells per well and incubated for 2 h at  
371 37°C. Although ROCKi is not essential for seeding hESCs as single cells on LN521, its  
372 addition to the seeding suspension yielded better long-term attachment of micropatterned  
373 hESC colonies. After 2-3 h, the medium was changed to NS without ROCKi. When confluent  
374 colonies were observed, typically 12-18 h after seeding, induction towards primitive streak

375 associated and DE fates was started. For both differentiation protocols the basal medium  
376 was N2B27 consisting of 93% DMEM, 1% Pen/Strep, 1% MEM Non-Essential Amino Acids,  
377 0.1 mM  $\beta$ -mercaptoethanol, 1% GlutaMAX<sup>TM</sup>, 1% N2 Supplement and 2% B27 minus  
378 retinoic acid supplement (all from Thermo Fisher Scientific). To generate gastrulation  
379 associated fates, the N2B27 medium was supplemented with 50 ng/mL BMP4, 100 ng/mL  
380 NODAL and 10 ng/mL FGF2 (all from Biotechne). For the induction of the definitive  
381 endoderm associated fates, N2B27 medium was supplemented with 3  $\mu$ M CHIR  
382 (STEMCELL Technologies) and 100 ng/mL Activin A (Biotechne). After 48h of differentiation,  
383 the micropatterned colonies were fixed for subsequent protein expression analysis.

#### 384 Immunofluorescent stainings and image analysis

385 For immunofluorescent stainings, the cells were fixed with 3.7% paraformaldehyde (Sigma-  
386 Aldrich) for 20 min, rinsed three times with DPBS and then permeabilized with 100%  
387 methanol (Sigma-Aldrich) for 3 min. Blocking was performed using 10% Fetal Bovine Serum  
388 (FBS; Thermo Fisher Scientific) in DPBS at 4°C overnight. Primary antibodies were diluted in  
389 10% FBS and incubated at 4°C overnight. Then, cells were triple rinsed with DPBS and  
390 incubated with secondary antibodies and 10  $\mu$ g/mL Hoechst 33342 diluted in DPBS with  
391 10% FBS at room temperature for 2h, followed by the final triple rinse with DPBS. The nuclei  
392 in micropatterned hESC colonies were stained with DAPI instead of Hoechst. Antibody  
393 sources and concentrations are shown in **Table S2**.

394 Immunofluorescent images were taken using a LSM800 confocal microscope (ZEISS). The  
395 cell count analysis presented in Fig. S4 was done using ZEN desk imaging software  
396 (ZEISS). The immunofluorescent images for quantitative DE differentiation data presented in  
397 Fig. 1E were taken using an IX-81 fluorescent microscope (Olympus) with Cell^F software  
398 (Olympus) and counted with ImageJ software. We analysed at least 1000 cells per biological  
399 replicate. To obtain quantitative single-cell data from micropatterned colonies the plates  
400 were scanned with Cellomics Arrayscan VTI platform (Thermo Fisher Scientific) using the



401 'TargetActivation.V4' bioassay algorithm. This algorithm utilizes the fluorescent intensity in  
402 the DAPI channel to identify individual nuclei in all fields imaged and acquires the associated  
403 intensity of proteins of interest localized within the identified region. Single-cell data  
404 extracted from immunofluorescent images were exported into a custom-built software for  
405 image analysis, ContextExplorer (Ostblom et al., 2019), which classifies cells into colonies  
406 and calculates the percentage of cells positive for proteins of interest per single colony.

#### 407 Quantitative real-time PCR analysis

408 For qRT-PCR gene expression analysis, total RNA was extracted using the RNeasy Mini Kit  
409 or RNeasy Micro Kit (Qiagen) with on-column DNase digest. Reverse transcription was  
410 performed using the First-Strand cDNA Synthesis Kit (GE Healthcare). Quantitative RT-PCR  
411 was performed using qPCR MasterMix Plus Low ROX (Eurogentec) and TaqMan Gene  
412 Expression Assays (Thermo Fisher Scientific). The samples were run on the ViiA 7  
413 thermocycler (Thermo Fisher Scientific) using standard cycling parameters provided by the  
414 manufacturer. The relative expression of genes of interest was calculated by the  $\Delta Ct$  and  
415  $\Delta\Delta Ct$  method with *GUSB* used as a reference gene. For gene expression analysis after the  
416 differentiation towards hepatic progenitors, *UBC* was used as a second reference gene.  
417 References for the TaqMan assays can be found in **Table S3**.

#### 418 Statistical analysis

419 Statistical analysis for quantitative immunofluorescent data and qRT-PCR gene expression  
420 analysis was performed using the GraphPad Prism software (version 7.04; GraphPad  
421 Software, Inc.). An unpaired t-test was performed when comparing two conditions and a  
422 one-way ANOVA followed by Bonferroni correction for more than two conditions. The  
423 significance level was set at p-value <0.05.

#### 424 mRNA sequencing

425 Total RNA was extracted using the RNeasy Mini Kit (Qiagen) with on-column DNase digest.  
426 The concentration and quality of extracted RNA were evaluated using the Quant-iT  
427 RiboGreen RNA Assay Kit (Thermo Fisher Scientific) and the RNA 6000 Pico Chip (Agilent  
428 Technologies), respectively. Subsequently, 500 ng of RNA was used to perform an Illumina  
429 sequencing library preparation using the QuantSeq 3' mRNA-Seq Library Prep Kit (Lexogen)  
430 according to the manufacturer's protocol. During library preparation 15 PCR cycles were  
431 used. Libraries were quantified by qRT-PCR, according to Illumina's protocol 'Sequencing  
432 Library qPCR Quantification protocol guide', version February 2011. The library's size  
433 distribution and quality were analysed using the High sensitivity DNA Chip (Agilent  
434 Technologies) on a 2100 Bioanalyzer platform (Agilent Technologies). Sequencing was  
435 performed on a NextSeq 500 (Illumina), generating 75 bp single-end reads. Two separate  
436 sequencing runs were performed, one for the undifferentiated hESC samples and one for  
437 the 24-hour ME differentiation samples. All data were deposited in the GEO repository with  
438 accession number GSE148050.

439 Details on the downstream bioinformatic analysis of mRNA sequencing can be found in the  
440 Supplemental Information.

#### 441 Transfection for siRNA knockdown

442 Human ESCs were seeded on LN521 at a density of  $4 \times 10^4$  cells per  $\text{cm}^2$  and the  
443 transfection was done the next day once the cells were around 50% confluent. The siRNAs  
444 used were ON-TARGETplus Human NANOG siRNA SMARTpool and ON-TARGETplus  
445 Non-targeting siRNA (Dharmacon, Cat.No L-014489-00-0005 and D-001810-01-05,  
446 respectively). Transfection was performed using siRNAs at the final concentration of 50nM  
447 and Lipofectamine RNAiMAX diluted in OptiMEM medium following manufacturer's protocol  
448 (Thermo Fischer Scientific). The cells were incubated with transfection reagents for 24h after  
449 which the differentiation was started.

## 450 **Author Contributions**

451 D.D. co-designed the project, performed most experiments and co-wrote the manuscript,  
452 M.T. helped with micropatterned differentiation experiments and protein expression analysis,  
453 A.K. helped with the hepatic differentiation experiments, L.T. and F.V.N. performed the RNA  
454 sequencing and most bio-informatic analyses, L.P. assisted with transfection experiments,  
455 J.O. helped with micropatterned differentiation analysis, E.C.D.D. performed part of bio-  
456 informatic analyses, C.M. and S.F. helped with protein expression analysis, C.S. and P.W.Z.  
457 provided important intellectual contributions, K.S. supervised the project and co-wrote the  
458 manuscript, M.G. supervised the project, co-designed and co-wrote the manuscript. All  
459 authors revised and approved the manuscript.

## 460 **Acknowledgments**

461 This work was supported by the Methusalem grant of Vrije Universiteit Brussel granted to  
462 K.S. D.D. is a PhD fellow of Research Foundation – Flanders (Fonds voor Wetenschappelijk  
463 Onderzoek, FWO – Vlaanderen). A.K. is a PhD fellow of FWO (Strategisch Basisonderzoek).  
464 The authors would like to thank Geoffrey Duque for the technical assistance with LSM800  
465 confocal microscope and the NXTGNT team for performing the mRNA-sequencing.

## 466 **Declaration of Interests**

467 The authors declare no competing interests.

## 468 **References**

469 Adewumi, O., Aflatoonian, B., Ahrlund-Richter, L., Amit, M., Andrews, P.W., Beighton, G.,  
470 Bello, P. a, Benvenisty, N., Berry, L.S., Bevan, S., et al. (2007). Characterization of human  
471 embryonic stem cell lines by the International Stem Cell Initiative. *Nat. Biotechnol.* 25, 803–  
472 816.

473 Avior, Y., Biancotti, J.C., and Benvenisty, N. (2015). TeratoScore: Assessing the

474 Differentiation Potential of Human Pluripotent Stem Cells by Quantitative Expression  
475 Analysis of Teratomas. *Stem Cell Reports* 4, 967–974.

476 Bertero, A., Madrigal, P., Galli, A., Hubner, N.C., Moreno, I., Burks, D., Brown, S., Pedersen,  
477 R.A., Gaffney, D., Mendjan, S., et al. (2015). Activin/Nodal signaling and NANOG  
478 orchestrate human embryonic stem cell fate decisions by controlling the H3K4me3  
479 chromatin mark. *Genes Dev.* 29, 702–717.

480 Bock, C., Kiskinis, E., Verstappen, G., Gu, H., Boulting, G., Smith, Z.D., Ziller, M., Croft,  
481 G.F., Amoroso, M.W., Oakley, D.H., et al. (2011). Reference Maps of human ES and iPS cell  
482 variation enable high-throughput characterization of pluripotent cell lines. *Cell* 144, 439–452.

483 Boyer, L.A., Tong, I.L., Cole, M.F., Johnstone, S.E., Levine, S.S., Zucker, J.P., Guenther,  
484 M.G., Kumar, R.M., Murray, H.L., Jenner, R.G., et al. (2005). Core transcriptional regulatory  
485 circuitry in human embryonic stem cells. *Cell* 122, 947–956.

486 Brown, S., Teo, A., Pauklin, S., Hannan, N., Cho, C.H.-H., Lim, B., Vardy, L., Dunn, N.R.,  
487 Trotter, M., Pedersen, R., et al. (2011). Activin/Nodal Signaling Controls Divergent  
488 Transcriptional Networks in Human Embryonic Stem Cells and in Endoderm Progenitors.  
489 *Stem Cells* 29, 1176–1185.

490 Cameron, K., Tan, R., Schmidt-Heck, W., Campos, G., Lyall, M.J., Wang, Y., Lucendo-  
491 Villarin, B., Szkolnicka, D., Bates, N., Kimber, S.J., et al. (2015). Recombinant Laminins  
492 Drive the Differentiation and Self-Organization of hESC-Derived Hepatocytes. *Stem Cell*  
493 *Reports* 5, 1250–1262.

494 D'Amour, K.A., Agulnick, A.D., Eliazer, S., Kelly, O.G., Kroon, E., and Baetge, E.E. (2005).  
495 Efficient differentiation of human embryonic stem cells to definitive endoderm. *Nat*  
496 *Biotechnol* 23, 1534–1541.

497 D'Amour, K.A., Bang, A.G., Eliazer, S., Kelly, O.G., Agulnick, A.D., Smart, N.G., Moorman,  
498 M.A., Kroon, E., Carpenter, M.K., and Baetge, E.E. (2006). Production of pancreatic

499 hormone-expressing endocrine cells from human embryonic stem cells. *Nat. Biotechnol.* **24**,  
500 1392–1401.

501 Dziedzicka, D., Markouli, C., Barbé, L., Spits, C., Sermon, K., and Geens, M. (2016). A High  
502 Proliferation Rate is Critical for Reproducible and Standardized Embryoid Body Formation  
503 from Laminin-521-Based Human Pluripotent Stem Cell Cultures. *Stem Cell Rev. Reports* **12**,  
504 721–730.

505 Funa, N.S., Schachter, K.A., Lerdrup, M., Ekberg, J., Hess, K., Dietrich, N., Honore, C.,  
506 Hansen, K., and Semb, H. (2015). B-Catenin Regulates Primitive Streak Induction through  
507 Collaborative Interactions with SMAD2/SMAD3 and OCT4. *Cell Stem Cell* **16**, 1–14.

508 Hannan, N., Segeritz, C.-P., Touboul, T., and Vallier, L. (2013). Production of hepatocyte-like  
509 cells from human pluripotent stem cells. *Nat. Protoc.* **8**, 430–437.

510 Hu, B.-Y., Weick, J.P., Yu, J., Ma, L.-X., Zhang, X.-Q., Thomson, J. a, and Zhang, S.-C.  
511 (2010). Neural differentiation of human induced pluripotent stem cells follows developmental  
512 principles but with variable potency. *Proc. Natl. Acad. Sci. U. S. A.* **107**, 4335–4340.

513 Jacobs, K., Mertzaniidou, A., Geens, M., Thi Nguyen, H., Staessen, C., and Spits, C. (2014).  
514 Low-grade chromosomal mosaicism in human somatic and embryonic stem cell populations.  
515 *Nat. Commun.* **5**, 4227.

516 Jiang, W., Zhang, D., Bursac, N., and Zhang, Y. (2013). WNT3 Is a Biomarker Capable of  
517 Predicting the Definitive Endoderm Differentiation Potential of hESCs. *Stem Cell Reports* **1**,  
518 46–52.

519 Kattman, S.J., Witty, A.D., Gagliardi, M., Dubois, N.C., Niapour, M., Hotta, A., Ellis, J., and  
520 Keller, G. (2011). Stage-specific optimization of activin/nodal and BMP signaling promotes  
521 cardiac differentiation of mouse and human pluripotent stem cell lines. *Cell Stem Cell* **8**,  
522 228–240.

523 Keller, A., Dziedzicka, D., Zambelli, F., Markouli, C., Sermon, K., Spits, C., and Geens, M.

524 (2018). Genetic and epigenetic factors which modulate differentiation propensity in human  
525 pluripotent stem cells. *Hum. Reprod. Update* 24, 162–175.

526 Kilpinen, H., Goncalves, A., Leha, A., Afzal, V., Alasoo, K., Ashford, S., Bala, S., Bensaddek,  
527 D., Casale, F.P., Culley, O.J., et al. (2017). Common genetic variation drives molecular  
528 heterogeneity in human iPSCs. *Nature* 546, 370–375.

529 Kim, H., Lee, G., Ganat, Y., Papapetrou, E.P., Lipchina, I., Socci, N.D., Sadelain, M., and  
530 Studer, L. (2011). miR-371-3 expression predicts neural differentiation propensity in human  
531 pluripotent stem cells. *Cell Stem Cell* 8, 695–706.

532 Kim, S., Kim, B., Gil, J., Kim, S., and Kim, J. (2007). Comparative analysis of the  
533 developmental competence of three human embryonic stem cell lines in vitro. *Mol. Cells* 23,  
534 49–56.

535 Lanner, F., and Rossant, J. (2010). The role of FGF/Erk signaling in pluripotent cells.  
536 *Development* 137, 3351–3360.

537 Loh, K.M., Ang, L.T., Zhang, J., Kumar, V., Ang, J., Auyeong, J.Q., Lee, K.L., Choo, S.H.,  
538 Lim, C.Y.Y., Nichane, M., et al. (2014). Efficient endoderm induction from human pluripotent  
539 stem cells by logically directing signals controlling lineage bifurcations. *Cell Stem Cell* 14,  
540 237–252.

541 Markouli, C., De Deckersberg, E.C., Regin, M., Nguyen, H.T., Zambelli, F., Keller, A.,  
542 Dziedzicka, D., De Kock, J., Tilleman, L., Van Nieuwerburgh, F., et al. (2019). Gain of  
543 20q11.21 in Human Pluripotent Stem Cells Impairs TGF- $\beta$ -Dependent Neuroectodermal  
544 Commitment. *Stem Cell Reports* 13, 163–176.

545 Mateizel, I., De Temmerman, N., Ullmann, U., Cauffman, G., Sermon, K., Van de Velde, H.,  
546 De Rycke, M., Degreef, E., Devroey, P., Liebaers, I., et al. (2006). Derivation of human  
547 embryonic stem cell lines from embryos obtained after IVF and after PGD for monogenic  
548 disorders. *Hum. Reprod.* 21, 503–511.

- 549 Ortmann, D., and Vallier, L. (2017). Variability of human pluripotent stem cell lines. *Curr.*  
550 *Opin. Genet. Dev.* *46*, 179–185.
- 551 Osafune, K., Caron, L., Borowiak, M., Martinez, R.J., Fitz-Gerald, C.S., Sato, Y., Cowan, C.  
552 a, Chien, K.R., and Melton, D. a (2008). Marked differences in differentiation propensity  
553 among human embryonic stem cell lines. *Nat. Biotechnol.* *26*, 313–315.
- 554 Ostblom, J., Nazareth, E.J.P., Tewary, M., and Zandstra, P.W. (2019). Context-explorer:  
555 Analysis of spatially organized protein expression in high-throughput screens. *PLoS Comput.*  
556 *Biol.* *15*, 1–13.
- 557 Pagliuca, F.W., Millman, J.R., Gurtler, M., Segel, M., Van Dervort, A., Ryu, J.H., Peterson,  
558 Q.P., Greiner, D., and Melton, D.A. (2014). Generation of functional human pancreatic b  
559 cells in vitro. *Cell* *159*, 428–439.
- 560 Ran, D., Shia, W.-J., Lo, M.-C., Fan, J.-B., Knorr, D. a, Ferrell, P.I., Ye, Z., Yan, M., Cheng,  
561 L., Kaufman, D.S., et al. (2013). RUNX1a enhances hematopoietic lineage commitment from  
562 human embryonic stem cells and inducible pluripotent stem cells. *Blood* *121*, 2882–2890.
- 563 Rezanian, A., Bruin, J.E., Riedel, M.J., Mojibian, M., Asadi, A., Xu, J., Gauvin, R., Narayan,  
564 K., Karanu, F., O’Neil, J.J., et al. (2012). Maturation of human embryonic stem cell-derived  
565 pancreatic progenitors into functional islets capable of treating pre-existing diabetes in mice.  
566 *Diabetes* *61*, 2016–2029.
- 567 Singh, A.M., Reynolds, D., Cliff, T., Ohtsuka, S., Mattheyses, A.L., Sun, Y., Menendez, L.,  
568 Kulik, M., and Dalton, S. (2012). Signaling network crosstalk in human pluripotent cells: a  
569 Smad2/3-regulated switch that controls the balance between self-renewal and differentiation.  
570 *Cell Stem Cell* *10*, 312–326.
- 571 Skottman, H., Mikkola, M., Lundin, K., Olsson, C., Strömberg, A.-M., Tuuri, T., Otonkoski, T.,  
572 Hovatta, O., and Lahesmaa, R. (2005). Gene expression signatures of seven individual  
573 human embryonic stem cell lines. *Stem Cells* *23*, 1343–1356.

- 574 Sui, L., Mfopou, J., Geens, M., Sermon, K., and Bouwens, L. (2012). FGF signaling via  
575 MAPK is required early and improves Activin A-induced definitive endoderm formation from  
576 human embryonic stem cells. *Biochem. Biophys. Res. Commun.* *426*, 380–385.
- 577 Tewary, M., Ostblom, J., Prochazka, L., Zulueta-Coarasa, T., Shakiba, N., Fernandez-  
578 Gonzalez, R., and Zandstra, P.W. (2017). A stepwise model of Reaction-Diffusion and  
579 Positional-Information governs self-organized human peri-gastrulation-like patterning.  
580 *Development* *144*, 4298–4312.
- 581 Tewary, M., Shakiba, N., and Zandstra, P.W. (2018). Stem cell bioengineering: building from  
582 stem cell biology. *Nat. Rev. Genet.* *19*, 595–614.
- 583 Tewary, M., Dziejzicka, D., Ostblom, J., Prochazka, L., Shakiba, N., Heydari, T., Aguilar-  
584 Hidalgo, D., Woodford, C., Piccinini, E., Becerra-Alonso, D., et al. (2019). High-throughput  
585 micropatterning platform reveals Nodal-dependent bisection of peri-gastrulation-associated  
586 versus preneurulation-associated fate patterning. *PLoS Biol.* *17*, e3000081.
- 587 Tsankov, A.M., Akopian, V., Pop, R., Chetty, S., Gifford, C.A., Daheron, L., Tsankova, N.M.,  
588 and Meissner, A. (2015). A qPCR ScoreCard quantifies the differentiation potential of human  
589 pluripotent stem cells. *Nat. Biotechnol.* *33*, 1182–1192.
- 590 Vallier, L., Mendjan, S., Brown, S., Chng, Z., Teo, A., Smithers, L.E., Trotter, M.W.B., Cho,  
591 C.H.-H., Martinez, A., Rugg-Gunn, P., et al. (2009). Activin/Nodal signalling maintains  
592 pluripotency by controlling Nanog expression. *Development* *136*, 1339–1349.
- 593 Wamaitha, S.E., Grybel, K.J., Alanis-Lobato, G., Gerri, C., Ogushi, S., McCarthy, A.,  
594 Mahadevaiah, S.K., Healy, L., Lea, R.A., Molina-Arcas, M., et al. (2020). IGF1-mediated  
595 human embryonic stem cell self-renewal recapitulates the embryonic niche. *Nat. Commun.*  
596 *11*, 1–16.
- 597 Wang, Z., Oron, E., Nelson, B., Razis, S., and Ivanova, N. (2012). Distinct lineage  
598 specification roles for NANOG, OCT4, and SOX2 in human embryonic stem cells. *Cell Stem*



599 Cell 10, 440–454.

600 Yoney, A., Etoc, F., Ruzo, A., Carroll, T., Metzger, J.J., Martyn, I., Li, S., Kirst, C., Siggia,  
601 E.D., and Brivanlou, A.H. (2018). WNT signaling memory is required for ACTIVIN to function  
602 as a morphogen in human gastruloids. *Elife* 7, 1–28.

### 603 **Figure Titles and Legends**

604 **Figure 1.** Differentiation propensity screen of four hESC lines shows that the VUB04 line has  
605 a low differentiation efficiency towards definitive endoderm (DE). A) Schematic overview of  
606 differentiation protocols used to direct the cells towards mesendoderm (ME), DE and hepatic  
607 progenitors (HP). Created with BioRender. B) Gene expression levels of *T* in hESCs and ME  
608 samples. Black triangles and green dots represent undifferentiated and differentiated  
609 samples, respectively. C) Representative immunofluorescent images for *T* and *SOX2* after  
610 24-hour ME differentiation. D) Expression level of *SOX17*, *FOXA2* and *POU5F1* in hESCs  
611 and DE samples. Black triangles and green dots represent undifferentiated and differentiated  
612 samples, respectively. E) Percentage of *SOX17*- and *POU5F1*-positive cells after 72-hour  
613 DE differentiation of hESC lines. F) Representative immunofluorescent images for *SOX17*  
614 and *FOXA2* after DE differentiation of VUB01 and VUB04. G) Comparison of expression  
615 levels of hepatic, DE and pluripotency markers between VUB01 and VUB04 in HP samples.  
616 H) Representative immunostainings for *HNF4α* after 8-day HP differentiation of VUB01 and  
617 VUB04. All scale bars represent 100 μm. All gene expression data and the quantified  
618 immunofluorescent data are representative of at least three (panel B and D) or three (panel  
619 G) biological replicates. The p-values were calculated using either one-way ANOVA (panel  
620 B, D and E) or unpaired t-test (panel G). For panels B and D, the p-values were calculated  
621 only for differentiated samples (green dots).

622 **Figure 2.** Micropatterned differentiation confirms the low differentiation propensity of VUB04  
623 towards definitive endoderm (DE). A) Schematic overview of micropatterned differentiation  
624 protocols used to direct four hESC lines towards primitive streak and DE like fates in 1000

625  $\mu\text{m}$  in diameter circular colonies. Created with BioRender. B) Representative  
626 immunofluorescent images for T and SOX2 after 48-hour micropatterned differentiation  
627 towards primitive streak fates. C) Percentage of T- and SOX2-positive cells after peri-  
628 gastrulation-like differentiation observed within the tested lines. Each data point represents  
629 one individual colony. Number of colonies were 120, 91, 120 and 134 for VUB02, VUB01,  
630 VUB03 and VUB04, respectively. Data pooled from two independent experiments. Error bars  
631 represent mean  $\pm$  SD. D) Representative images for SOX17 and FOXA2 after 48-hour DE  
632 micropatterned differentiation. E) Percentage of SOX17-positive, FOXA2-positive and  
633 double-positive cells after DE differentiation observed in the tested lines. Each data point  
634 represents one individual colony. Number of colonies were 370, 318, 201 and 300 for  
635 VUB02, VUB01, VUB03 and VUB04, respectively. Data pooled from two independent  
636 experiments. Error bars represent mean  $\pm$  SD. All p-values were calculated using one-way  
637 ANOVA. All scale bars represent 100  $\mu\text{m}$ .

638 **Figure 3.** Transcriptomic analysis reveals that VUB04 has a distinct expression profile at the  
639 undifferentiated stage. A) Unsupervised hierarchical clustering and heatmap of  
640 transcriptome data of all lines tested. B) Principal Component Analysis of dimension 1  
641 versus dimension 2 based on normalized transcriptome data. C) Volcano plot based on a  
642 comparison of gene expression levels between VUB04 and the control group (VUB01,  
643 VUB02 and VUB03). Genes with  $|\log_2 \text{fold change}| > 1$  and  $\text{FDR} < 0.05$  were marked as  
644 either significantly upregulated (red) or downregulated (blue). D) Normalized expression  
645 values for selected pluripotency markers in the control group and VUB04. FC = fold change.  
646 E) Transcription factor enrichment for the top deregulated genes in VUB04 (based on top  
647  $|\log_2 \text{fold change}|$  and  $\text{FDR} < 0.05$ ) done by the Enrichr tool and based on CHEA and  
648 ENCODE databases.) F) and G) Enrichment profile for MAPK/ERK signalling (F) and PI3K  
649 signalling (G) performed on the ranked gene list based on a comparison of the expression  
650 levels between VUB04 and the control group. Rank 0 represents the gene with the highest-

651 ranking score. Vertical black bars represent genes within the ranked list belonging to the  
652 given pathway. NES = Normalized Enrichment score.

653 **Figure 4.** Transcriptomic profile after 24-hour DE differentiation suggests inefficient  
654 activation of WNT signalling in VUB04. A) Principal Component Analysis of dimension 1  
655 versus dimension 2 based on normalized transcriptome data. B) Volcano plot based on  
656 comparison of gene expression levels between VUB04 and the control group (VUB01 and  
657 VUB02). Genes with  $|\log_2$  fold change $| > 1$  and  $FDR < 0.05$  were marked as either  
658 significantly upregulated (red) or downregulated (blue). C) Transcription factor enrichment  
659 for the top deregulated genes ( $|\log_2$  fold change $|$  and  $FDR < 0.05$ ) in VUB04 done by Enrichr  
660 tool. D) Heatmap for gene expression levels (normalized counts per million) of pluripotency  
661 genes, WNT and NODAL signalling downstream targets, DE and epithelial-to-mesenchymal  
662 transition markers in the control group and in VUB04 after 24-hour DE differentiation. E)  
663 Prediction for upstream regulators of differentially expressed genes in the 24-hour DE  
664 VUB04 samples with  $|\log_2$  fold change $| > 1$  and  $FDR < 0.05$  done by Ingenuity Pathway  
665 Analysis. Only the upstream regulators with the activation z-score higher than 2 or lower  
666 than -2 and p-value  $< 0.05$  are shown.

667 **Figure 5.** Stronger activation of WNT signalling improves DE differentiation efficiency of  
668 VUB04. A) Representative immunofluorescent images for SOX17 after 72-hour DE  
669 differentiation of VUB01 and VUB04 in various differentiation conditions. The scale bar  
670 represents 100  $\mu\text{m}$ . B) Gene expression analysis of *SOX17*, *FOXA2* and *NANOG* in VUB01  
671 and VUB04 differentiated for 72h towards DE – standard differentiation condition (3 $\mu\text{M}$   
672 CHIR99021 for the first 24h) was compared to modified conditions (different concentration of  
673 CHIR99021 during the first 24h or additional incubation with PI3K inhibitor LY294002 for the  
674 first 48h). Data represents three biological replicates. C) Schematic illustration of the  
675 signalling pathways involved in the maintenance of pluripotency (white background) and  
676 mesendoderm (ME) specification (grey background). The lower part illustrates the difference  
677 in signalling pathway crosstalks between VUB01 and VUB04 hESC lines which influence the

678 differentiation outcome. Created with BioRender. D) Gene expression dynamics of  
679 pluripotency markers in VUB01 and VUB04 during the 72-hour DE differentiation. Data  
680 represents three biological replicates. The p-values were calculated with unpaired t-test. E)  
681 Comparison of *NANOG*, *SOX17* and *FOXA2* expression after 72-hour DE differentiation  
682 between VUB01 and VUB04 transfected cells. Data represents two biological replicates. F)  
683 Representative images for *SOX17* after 72-hour DE differentiation of VUB04 transfected with  
684 either non-targeting or *NANOG*-targeting siRNA. The scale bar represents 100  $\mu\text{m}$ .

**A**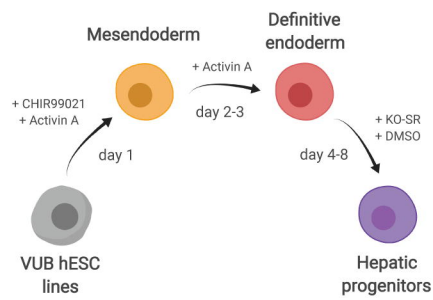**B**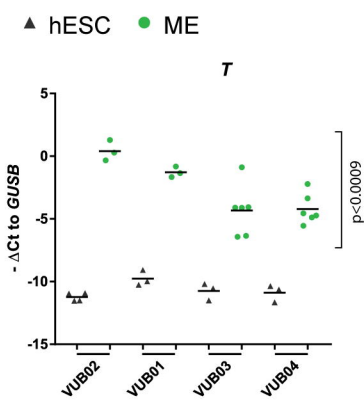**C**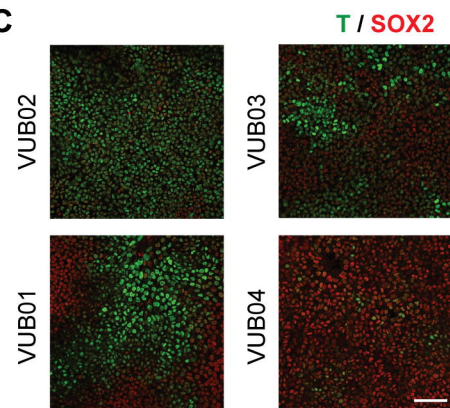**D**

▲ hESC ● DE

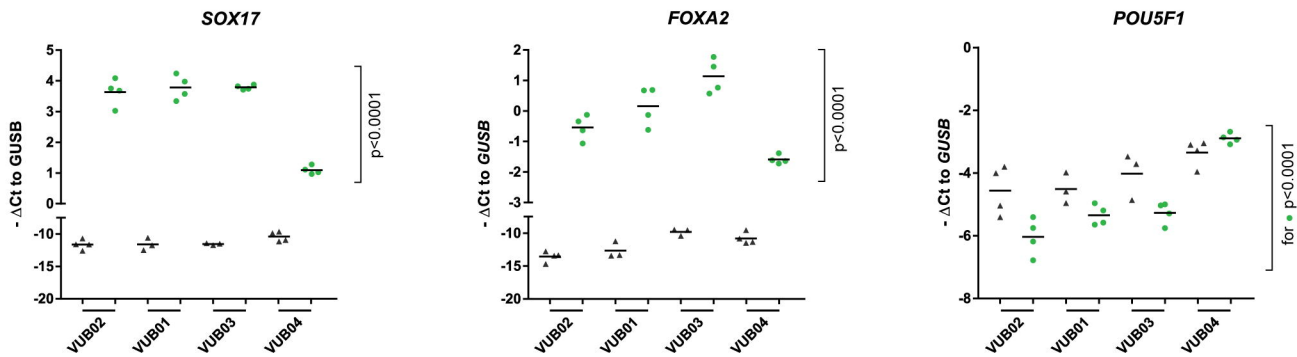**E**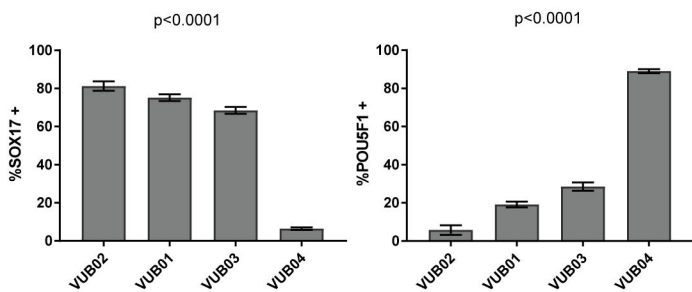**F**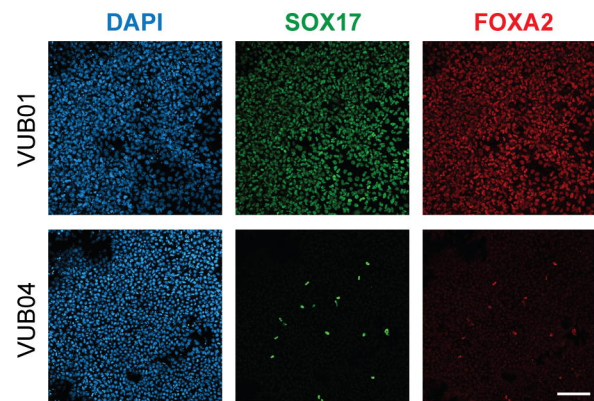**G**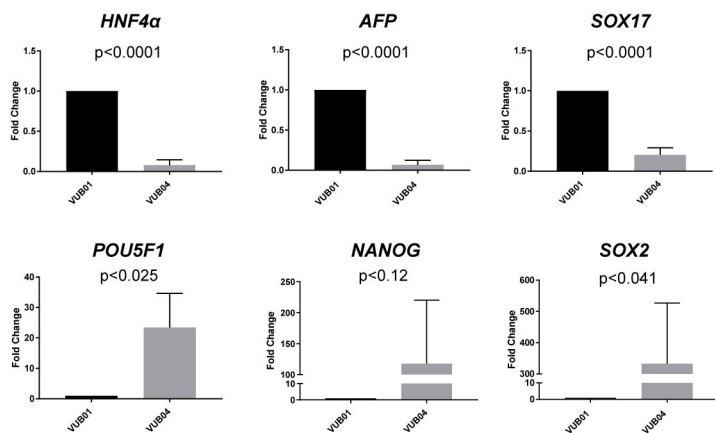**H**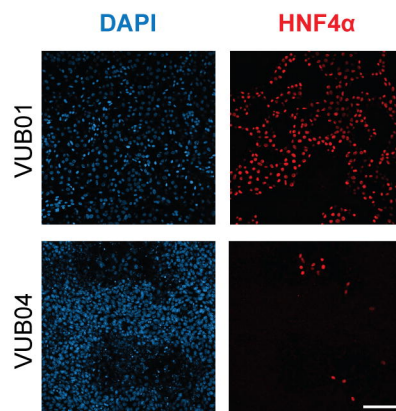

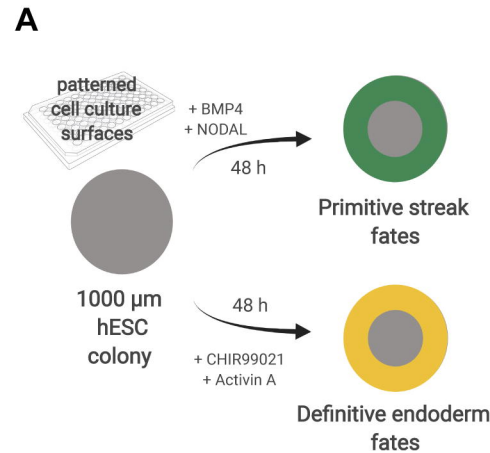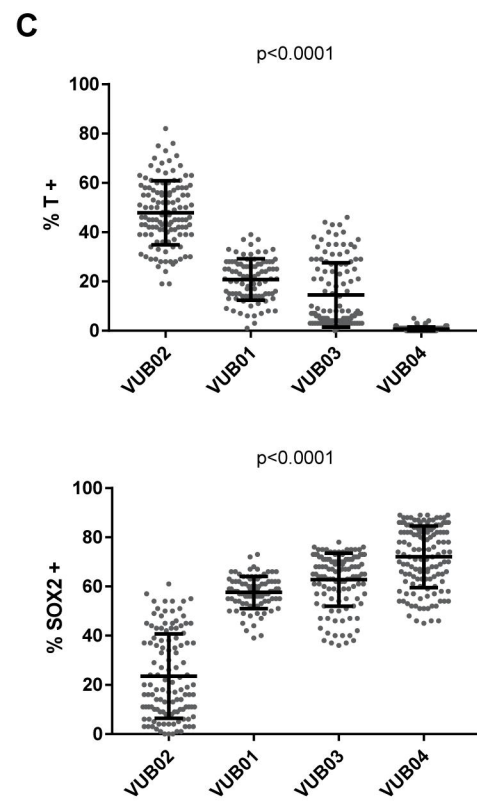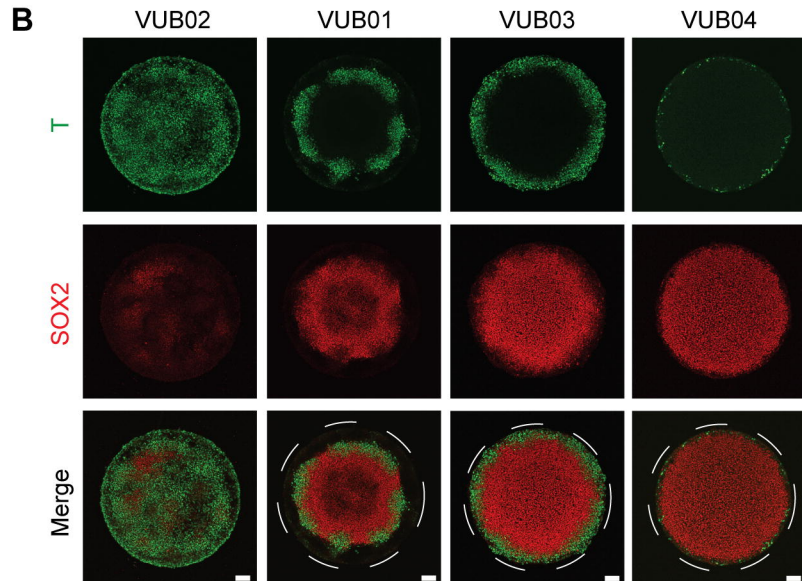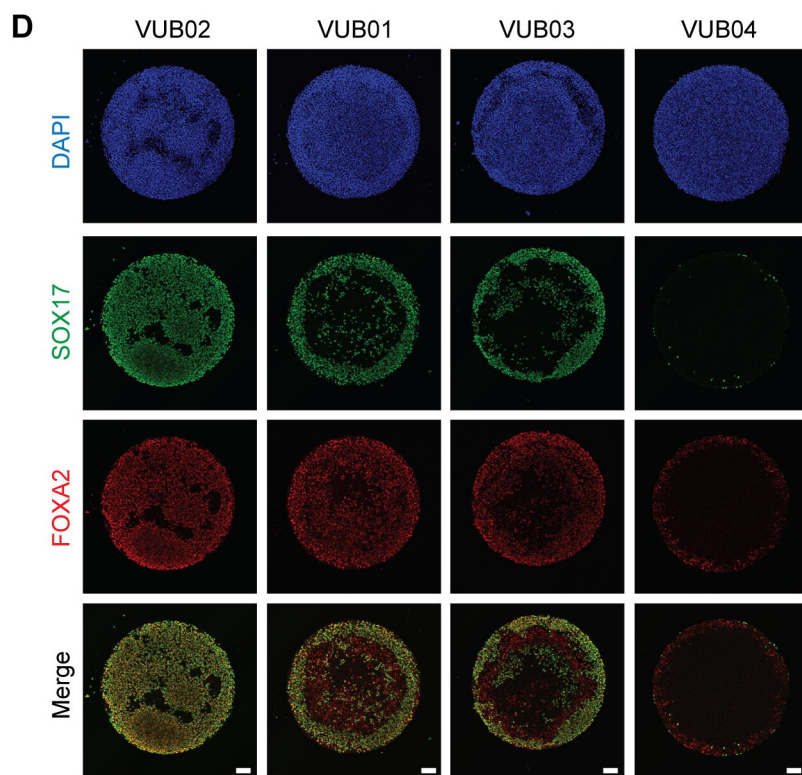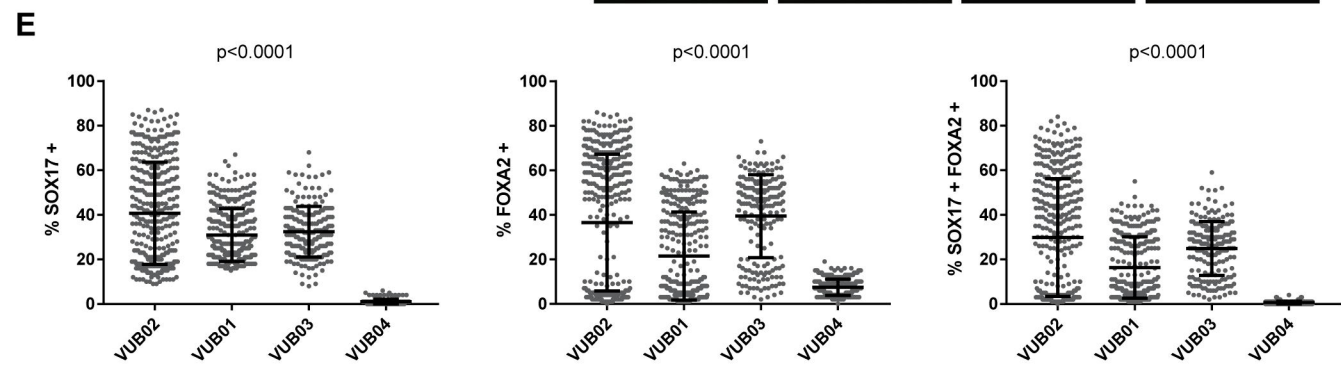

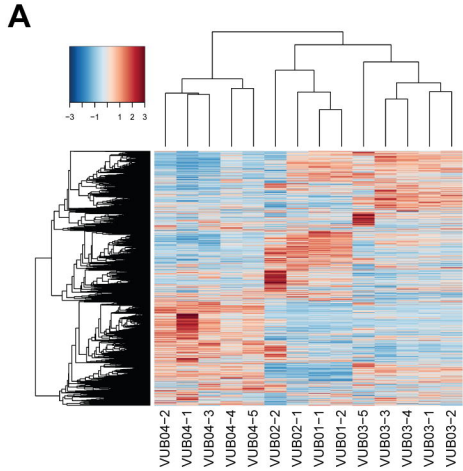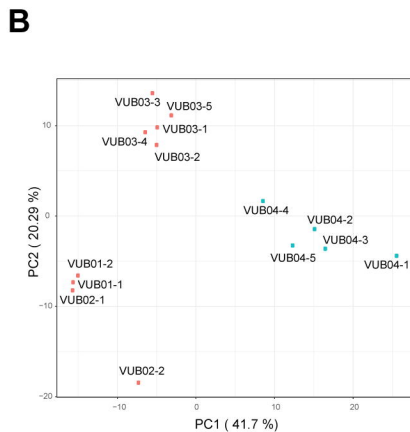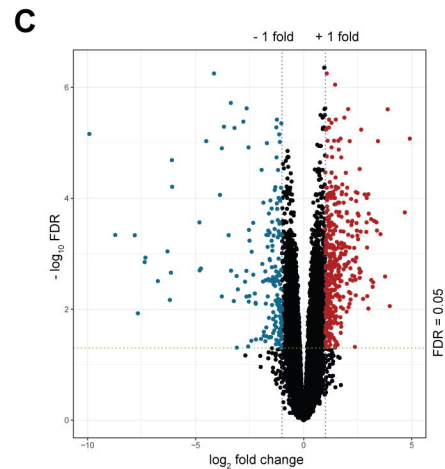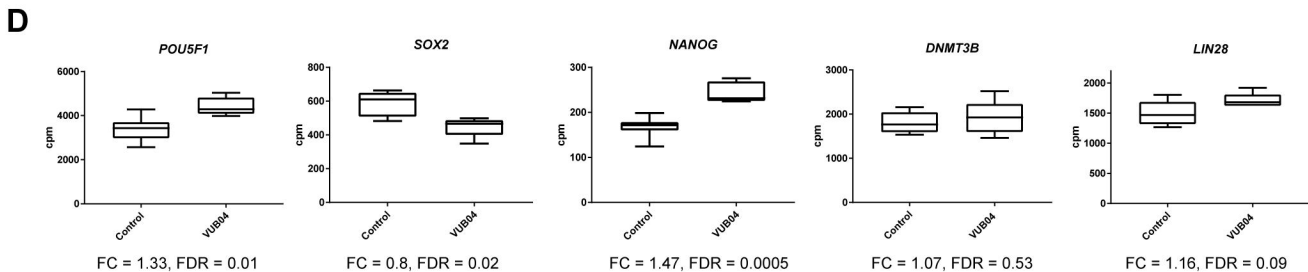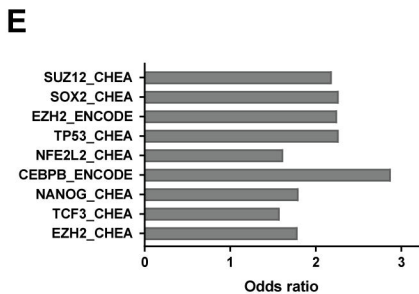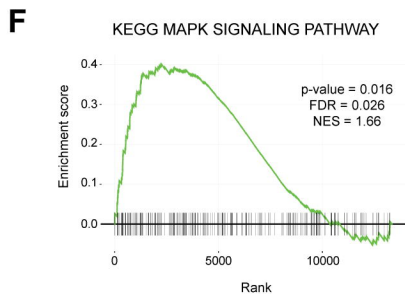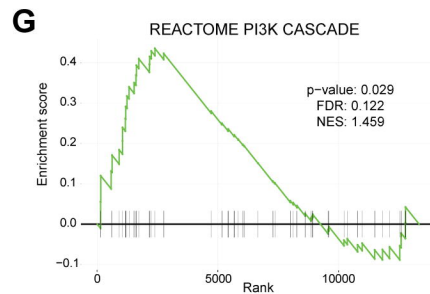

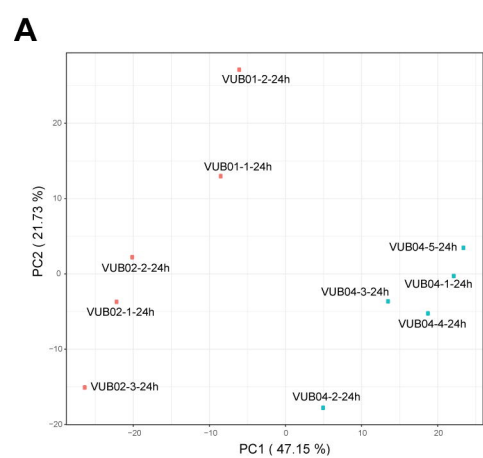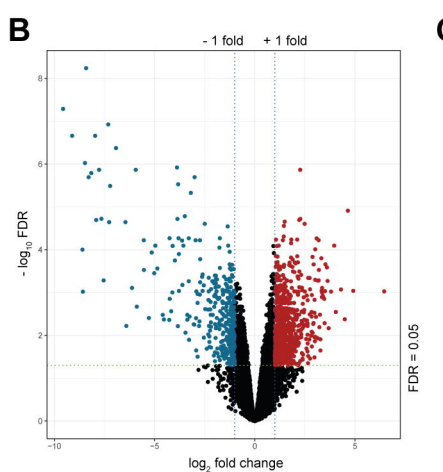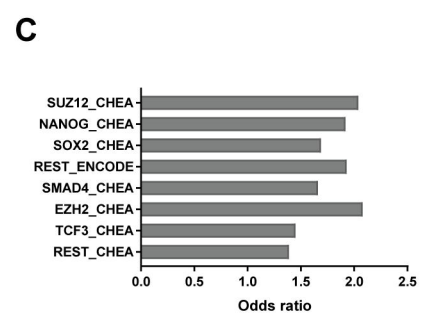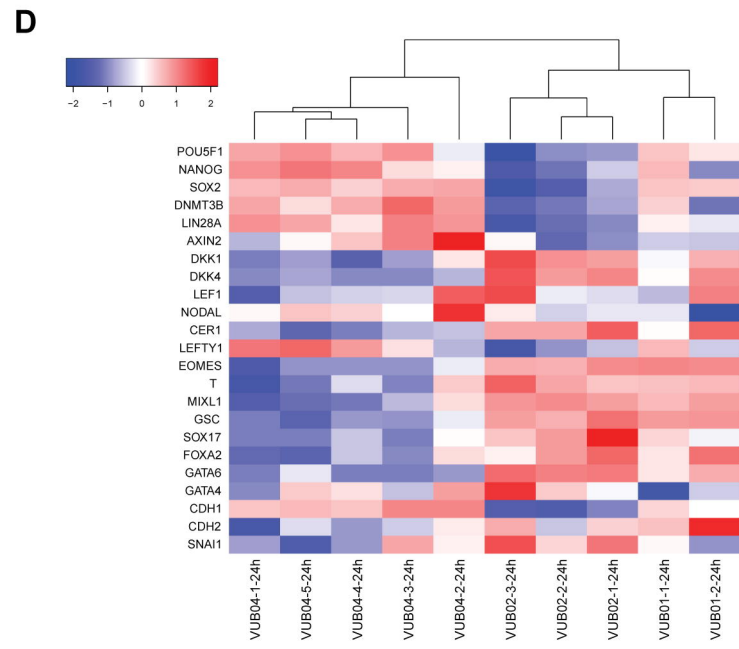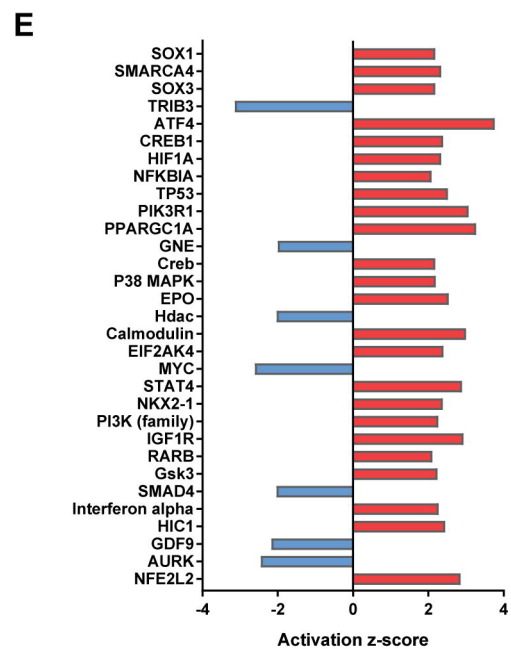



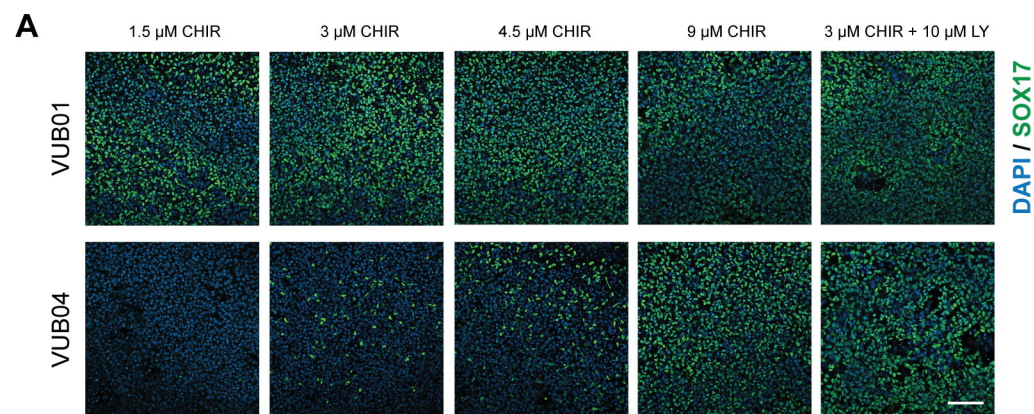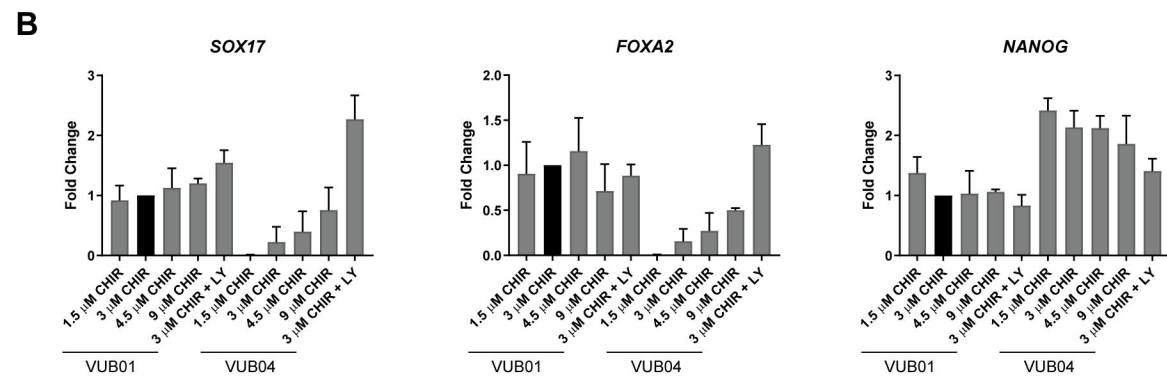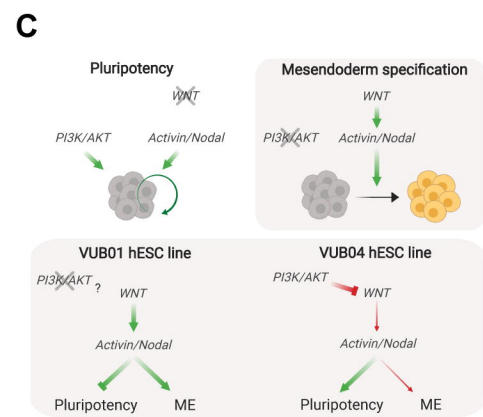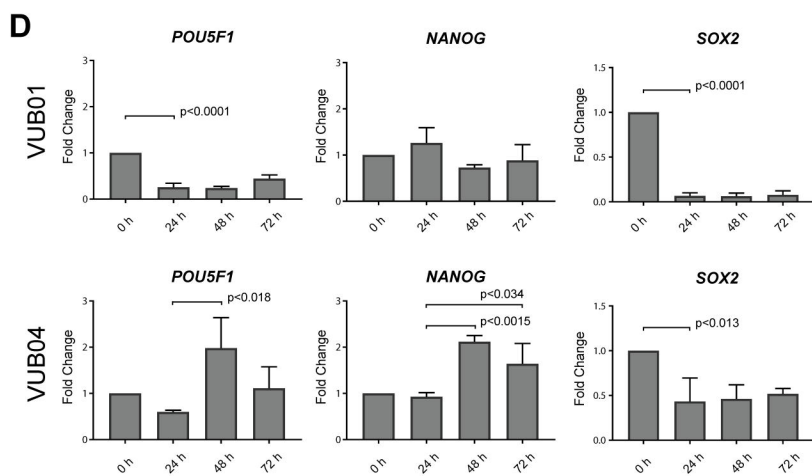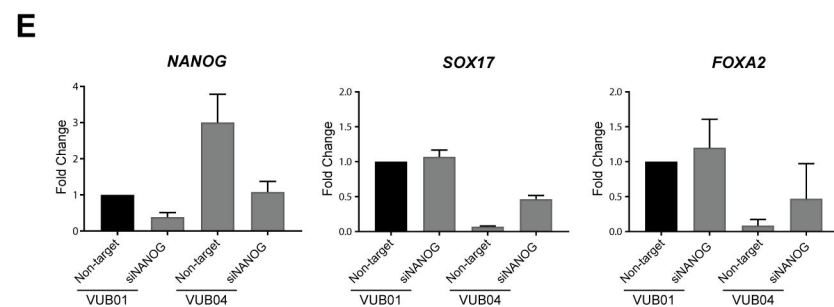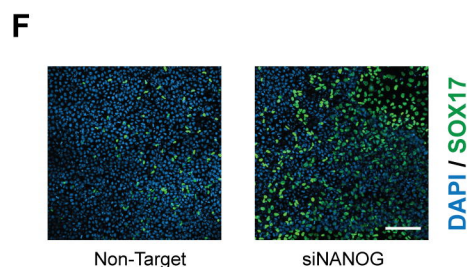

Source: https://www.biorxiv.org/content/biorxiv/early/2020/07/04/2020.07.03.186932.full.pdf
